# Supplementary material for: RE(H2C3N3O3)2·(OH)·xH2O (RE = La, Y and Gd): potential UV birefringent materials with strong optical anisotropy originating from the (H2C3N3O3)−group
Source: Royal Society of Chemistry journal article supplement (doi:10.1039/c9dt02512j), 2019-01-01
Supplement: c9dt02512j1.pdf [file c9dt02512j1.pdf]

## Supporting Information

### **RE(H<sub>2</sub>C<sub>3</sub>N<sub>3</sub>O<sub>3</sub>)<sub>2</sub>·(OH)·xH<sub>2</sub>O (RE = La, Y and Gd): potential UV birefringent materials with strong optical anisotropy originating from the (H<sub>2</sub>C<sub>3</sub>N<sub>3</sub>O<sub>3</sub>)<sup>-</sup> group**

Xia Hao,<sup>a,b</sup> Min Luo,<sup>\*a</sup> Chensheng Lin,<sup>a</sup> Donghong Lin<sup>a,c</sup>, Liling Cao<sup>a,c</sup> and Ning Ye<sup>\*a</sup>

**Table S1.** Atomic coordinates ( $\times 10^4$ ) and equivalent isotropic displacement parameters ( $\text{\AA}^2 \times 10^3$ ) for I, II and III.

I

| Atom | x         | y          | z         | U(eq)     |
|------|-----------|------------|-----------|-----------|
| La1  | 3531.3(4) | 4506.0(2)  | 2913.2(4) | 13.73(10) |
| O1   | 6235(5)   | 4728(2)    | 1817(5)   | 29.6(10)  |
| O2   | 551(5)    | 4826(2)    | 1686(5)   | 29.6(10)  |
| O3   | 1857(5)   | 5141(2)    | 4929(5)   | 28.2(9)   |
| O4   | 1697(5)   | 3511(2)    | 3740(5)   | 25.5(9)   |
| O5   | 4899(4)   | 4250.3(19) | 5745(4)   | 18.1(8)   |
| O6   | -1175(5)  | 1629(2)    | 831(5)    | 25.2(9)   |
| O7   | 2849(5)   | 984(2)     | 4995(5)   | 27.4(9)   |
| O8   | 5009(5)   | 1775(2)    | 7686(5)   | 24.4(9)   |
| O9   | 8156(5)   | 3655(2)    | 10390(5)  | 23.2(9)   |
| N1   | 6450(5)   | 4004(2)    | 8084(5)   | 14.6(9)   |
| N2   | 4793(5)   | 2994(2)    | 6628(5)   | 16.9(9)   |
| N3   | 6698(5)   | 2709(2)    | 8933(5)   | 18.2(10)  |
| N4   | 210(5)    | 2567(2)    | 2319(6)   | 19.9(10)  |
| N5   | 2298(5)   | 2259(2)    | 4400(5)   | 18.4(9)   |
| N6   | 855(5)    | 1245(2)    | 2851(6)   | 20.6(10)  |
| C1   | 5377(6)   | 3734(3)    | 6804(7)   | 16.0(11)  |
| C2   | 7141(6)   | 3479(3)    | 9172(6)   | 15.8(10)  |
| C3   | 5466(6)   | 2473(3)    | 7740(6)   | 16.9(11)  |
| C4   | 1423(6)   | 2812(3)    | 3497(7)   | 16.4(11)  |
| C5   | 2006(6)   | 1464(3)    | 4093(6)   | 18.6(11)  |
| C6   | -67(6)    | 1786(3)    | 1959(7)   | 18.6(11)  |

## II

| Atom | x         | y         | z        | U(eq)     |
|------|-----------|-----------|----------|-----------|
| Y1   | 6336.3(4) | 1045.8(3) | -6.8(3)  | 13.43(11) |
| O1   | 2612(4)   | 584(4)    | 5539(3)  | 38.4(7)   |
| O2   | 4365(4)   | 4240(3)   | 6482(3)  | 29.7(6)   |
| O3   | 4805(4)   | 2638(3)   | 1990(2)  | 28.4(6)   |
| O5   | 8145(4)   | 62(4)     | 1778(3)  | 35.9(7)   |
| O6   | 5482(3)   | -656(3)   | 1150(2)  | 24.7(5)   |
| O7   | 8402(4)   | -1358(3)  | -952(3)  | 40.5(7)   |
| O8   | 4638(3)   | 3734(3)   | -672(3)  | 29.0(6)   |
| O9   | 8067(4)   | 2402(4)   | 46(3)    | 39.2(7)   |
| O10  | 7318(3)   | 1275(3)   | -2411(3) | 29.6(6)   |
| O11  | 9226(4)   | 1950(4)   | -6816(3) | 36.4(7)   |
| O12  | 9227(4)   | 4981(3)   | -3251(3) | 32.2(6)   |
| N1   | 3473(4)   | 2373(4)   | 6132(3)  | 25.7(6)   |
| N2   | 3706(4)   | 1582(4)   | 3754(3)  | 25.5(7)   |
| N3   | 4542(4)   | 3474(3)   | 4239(3)  | 23.3(6)   |
| N4   | 8272(4)   | 3150(4)   | -2693(3) | 25.6(6)   |
| N5   | 8249(4)   | 1623(4)   | -4594(3) | 26.0(6)   |
| N6   | 9209(4)   | 3500(4)   | -5036(3) | 25.8(6)   |
| C1   | 3233(5)   | 1507(4)   | 5186(4)  | 24.4(7)   |
| C2   | 4114(5)   | 3369(4)   | 5675(4)  | 22.9(7)   |
| C3   | 4376(4)   | 2564(4)   | 3253(4)  | 21.4(7)   |
| C4   | 7920(4)   | 2025(4)   | -3176(4) | 23.0(7)   |
| C5   | 8920(4)   | 2334(4)   | -5559(4) | 24.0(7)   |
| C6   | 8908(4)   | 3902(4)   | -3616(4) | 23.8(7)   |

| O4         | 1460(4)   | 4195(4)   | 507(3)   | 40.1(7)   |
|------------|-----------|-----------|----------|-----------|
| <b>III</b> |           |           |          |           |
| Atom       | x         | y         | z        | U(eq)     |
| Gd1        | 6347.7(3) | 1066.5(3) | -1.7(2)  | 14.04(10) |
| O1         | 2617(6)   | 590(5)    | 5528(4)  | 32.3(10)  |
| O2         | 4369(5)   | 4238(5)   | 6480(4)  | 26.4(9)   |
| O3         | 4784(5)   | 2667(5)   | 2023(4)  | 24.3(8)   |
| O4         | 5490(5)   | -657(4)   | 1166(4)  | 20.0(8)   |
| O5         | 8179(5)   | 68(5)     | 1819(4)  | 29.8(9)   |
| O7         | 8452(5)   | -1385(5)  | -950(4)  | 32.0(10)  |
| O8         | 4617(5)   | 3788(4)   | -678(4)  | 23.1(8)   |
| O9         | 8139(6)   | 2424(5)   | 20(4)    | 32.4(10)  |
| O10        | 7332(5)   | 1270(5)   | -2425(4) | 24.4(9)   |
| O11        | 9256(6)   | 1946(5)   | -6797(4) | 30.7(10)  |
| O12        | 9222(5)   | 4984(5)   | -3261(4) | 26.3(9)   |
| N1         | 3477(6)   | 2379(5)   | 6124(5)  | 22.5(10)  |
| N2         | 3696(6)   | 1591(5)   | 3760(5)  | 20.7(9)   |
| N3         | 4530(6)   | 3491(5)   | 4253(5)  | 20.0(9)   |
| N4         | 8256(6)   | 1629(6)   | -4602(5) | 22.3(10)  |
| N5         | 8261(6)   | 3168(5)   | -2712(4) | 21.3(10)  |
| N6         | 9224(6)   | 3489(6)   | -5038(4) | 21.1(9)   |
| C1         | 3239(7)   | 1504(6)   | 5187(6)  | 20.4(11)  |
| C2         | 4118(6)   | 3381(6)   | 5677(5)  | 17.7(10)  |
| C3         | 4364(6)   | 2587(6)   | 3268(5)  | 18.0(10)  |
| C4         | 7920(6)   | 2035(6)   | -3192(5) | 19.3(11)  |
| C5         | 8908(7)   | 3906(6)   | -3623(5) | 17.7(10)  |
| C6         | 8938(7)   | 2327(6)   | -5555(5) | 20.0(11)  |
| O6         | 1447(5)   | 4214(5)   | 525(4)   | 31.3(10)  |

**Table S2.** Anisotropic displacement parameters ( $\text{\AA}^2 \times 10^3$ ) for **I**, **II** and **III**. The anisotropic displacement factor exponent takes the form:  $-2\pi^2[h^2a^*U_{11}+2hka^*b^*U_{12}+\dots]$ .

| <b>I</b> |           |          |           |          |           |           |
|----------|-----------|----------|-----------|----------|-----------|-----------|
| Atom     | U11       | U22      | U33       | U23      | U13       | U12       |
| La1      | 16.99(16) | 8.88(14) | 13.94(17) | 0.04(12) | -1.48(11) | -0.04(11) |
| O1       | 34(2)     | 19.0(18) | 39(3)     | -3.1(18) | 17(2)     | -1.1(17)  |
| O2       | 23(2)     | 22.3(19) | 38(3)     | -3.1(19) | -11.9(19) | 3.8(16)   |
| O3       | 33(2)     | 24(2)    | 27(2)     | -1.6(18) | 2.9(19)   | 2.4(17)   |
| O4       | 25(2)     | 13.2(17) | 36(3)     | -2.0(17) | -1.2(18)  | -2.6(15)  |
| O5       | 24.6(19)  | 13.4(16) | 14.1(19)  | 3.8(15)  | -3.2(16)  | 0.0(14)   |
| O6       | 25(2)     | 22.2(19) | 24(2)     | 2.4(17)  | -9.6(18)  | -2.1(16)  |
| O7       | 34(2)     | 17.2(18) | 26(2)     | 5.3(17)  | -10.0(19) | 0.5(16)   |
| O8       | 35(2)     | 12.3(16) | 25(2)     | 2.1(16)  | 0.0(18)   | -6.6(16)  |
| O9       | 32(2)     | 15.3(18) | 18(2)     | 0.8(15)  | -9.6(17)  | 0.9(15)   |
| N1       | 19(2)     | 11.9(19) | 11(2)     | 0.7(17)  | -3.8(18)  | -0.6(16)  |
| N2       | 19(2)     | 12.4(19) | 17(2)     | 2.2(18)  | -2.6(19)  | -0.2(16)  |
| N3       | 24(2)     | 11.1(19) | 17(2)     | -0.2(18) | -4.2(19)  | -3.9(17)  |
| N4       | 22(2)     | 12.5(19) | 24(3)     | 0.4(19)  | 0(2)      | -4.5(17)  |
| N5       | 20(2)     | 16(2)    | 19(2)     | 2.9(18)  | -0.1(19)  | -0.4(17)  |
| N6       | 22(2)     | 17(2)    | 20(3)     | 4.5(19)  | -4(2)     | -2.1(18)  |
| C1       | 15(2)     | 13(2)    | 20(3)     | 0(2)     | 2(2)      | 0.5(18)   |
| C2       | 18(2)     | 13(2)    | 16(3)     | -2(2)    | 3(2)      | 1(2)      |

|    |       |       |       |       |      |          |
|----|-------|-------|-------|-------|------|----------|
| C3 | 20(3) | 12(2) | 18(3) | -1(2) | 2(2) | -2.8(19) |
| C4 | 17(2) | 12(2) | 20(3) | 3(2)  | 3(2) | -1.4(19) |
| C5 | 20(3) | 18(2) | 18(3) | 0(2)  | 2(2) | -3(2)    |
| C6 | 19(3) | 15(2) | 21(3) | 2(2)  | 5(2) | 0(2)     |

## II

| Atom | U11       | U22       | U33       | U23      | U13       | U12        |
|------|-----------|-----------|-----------|----------|-----------|------------|
| Y1   | 19.43(17) | 14.41(16) | 10.10(16) | 0.15(10) | 0.71(10)  | -11.34(12) |
| O1   | 64(2)     | 42.5(17)  | 28.1(14)  | 4.3(12)  | -3.4(14)  | -42.2(16)  |
| O2   | 51.6(17)  | 29.4(13)  | 19.5(12)  | 1.5(10)  | -6.2(11)  | -27.7(13)  |
| O3   | 42.1(16)  | 27.4(13)  | 14.7(12)  | -1.2(10) | 1.7(11)   | -15.1(12)  |
| O5   | 43.1(17)  | 43.2(17)  | 32.1(15)  | 12.2(12) | -13.0(13) | -26.7(14)  |
| O6   | 35.8(14)  | 28.2(13)  | 20.4(12)  | 7.2(10)  | -5.9(10)  | -23.2(12)  |
| O7   | 50.8(19)  | 27.3(14)  | 32.9(15)  | 0.0(12)  | 14.8(13)  | -11.4(14)  |
| O8   | 39.8(15)  | 24.4(13)  | 21.9(13)  | 1.4(10)  | -0.6(11)  | -13.4(12)  |
| O9   | 53.7(19)  | 52.0(18)  | 33.8(15)  | 14.9(13) | -15.2(14) | -41.6(16)  |
| O10  | 39.2(15)  | 28.7(14)  | 25.6(13)  | 2.3(11)  | 7.0(11)   | -21.8(12)  |
| O11  | 52.4(18)  | 45.2(17)  | 22.5(13)  | -8.4(12) | 11.5(12)  | -34.7(15)  |
| O12  | 50.2(17)  | 33.1(14)  | 24.6(13)  | -3.9(11) | 4.3(12)   | -30.5(14)  |
| N1   | 39.0(18)  | 25.9(15)  | 18.3(14)  | 0.9(12)  | -1.7(12)  | -20.0(14)  |
| N2   | 38.8(18)  | 26.6(16)  | 18.1(14)  | -0.7(12) | -2.3(12)  | -20.9(14)  |
| N3   | 33.9(16)  | 24.7(15)  | 16.0(14)  | 0.1(11)  | -1.0(12)  | -17.4(13)  |
| N4   | 34.4(17)  | 26.4(15)  | 20.0(14)  | 1.9(12)  | 2.9(12)   | -18.4(14)  |
| N5   | 34.6(17)  | 27.4(16)  | 21.4(15)  | -0.1(12) | 5.0(12)   | -20.4(14)  |
| N6   | 35.0(17)  | 27.6(15)  | 21.1(15)  | 0.4(12)  | 3.7(12)   | -21.4(14)  |
| C1   | 32.7(19)  | 24.2(17)  | 21.7(17)  | 3.2(13)  | -4.6(14)  | -17.0(16)  |
| C2   | 30.2(18)  | 21.1(16)  | 18.8(16)  | 0.7(13)  | -2.0(13)  | -12.5(15)  |
| C3   | 25.4(17)  | 19.3(16)  | 18.8(16)  | 0.3(12)  | -1.4(13)  | -9.0(14)   |
| C4   | 23.0(17)  | 22.4(17)  | 23.8(17)  | 2.8(13)  | 2.8(13)   | -11.5(14)  |
| C5   | 26.5(18)  | 26.0(17)  | 21.9(17)  | -2.0(14) | 3.9(14)   | -15.2(15)  |
| C6   | 27.2(18)  | 23.2(17)  | 24.1(17)  | 0.3(14)  | 1.4(14)   | -14.8(15)  |
| O4   | 44.7(18)  | 37.8(16)  | 36.3(16)  | -1.1(13) | -3.8(13)  | -16.0(14)  |

## III

| Atom | U11       | U22       | U33       | U23      | U13       | U12        |
|------|-----------|-----------|-----------|----------|-----------|------------|
| Gd1  | 18.81(15) | 15.25(14) | 11.41(14) | 0.43(9)  | 0.12(9)   | -10.93(10) |
| O1   | 58(3)     | 35(2)     | 23(2)     | 4.9(18)  | -6(2)     | -37(2)     |
| O2   | 47(3)     | 29(2)     | 16.0(18)  | 1.5(16)  | -6.3(17)  | -27(2)     |
| O3   | 37(2)     | 22(2)     | 13.7(18)  | -0.9(15) | 1.8(16)   | -13.8(18)  |
| O4   | 26(2)     | 26(2)     | 17.9(18)  | 8.3(15)  | -7.7(15)  | -20.1(17)  |
| O5   | 35(2)     | 38(3)     | 27(2)     | 8.5(18)  | -11.8(18) | -24(2)     |
| O7   | 36(2)     | 24(2)     | 26(2)     | -2.8(17) | 11.5(18)  | -6.4(19)   |
| O8   | 29(2)     | 20.0(19)  | 18.8(18)  | 2.6(15)  | -2.1(15)  | -8.7(17)   |
| O9   | 41(3)     | 46(3)     | 29(2)     | 13(2)    | -13.3(19) | -34(2)     |
| O10  | 32(2)     | 27(2)     | 18.5(19)  | 1.3(16)  | 7.2(16)   | -19.3(19)  |
| O11  | 44(3)     | 41(3)     | 18.5(19)  | -7.8(18) | 7.7(18)   | -31(2)     |
| O12  | 43(3)     | 25(2)     | 19.9(19)  | -1.6(16) | 1.8(17)   | -25(2)     |
| N1   | 34(3)     | 23(2)     | 17(2)     | 2.8(18)  | -3.5(19)  | -19(2)     |
| N2   | 32(3)     | 21(2)     | 16(2)     | 1.5(17)  | -2.5(18)  | -18(2)     |
| N3   | 27(2)     | 20(2)     | 15(2)     | 0.1(17)  | -2.3(17)  | -13(2)     |
| N4   | 30(3)     | 24(2)     | 17(2)     | 0.0(18)  | 4.0(18)   | -17(2)     |

|    |       |       |       |          |          |        |
|----|-------|-------|-------|----------|----------|--------|
| N5 | 31(3) | 23(2) | 15(2) | 1.3(18)  | 3.2(18)  | -18(2) |
| N6 | 29(2) | 24(2) | 17(2) | -1.8(18) | 3.8(18)  | -18(2) |
| C1 | 28(3) | 18(3) | 18(2) | 2(2)     | -4(2)    | -11(2) |
| C2 | 23(3) | 19(3) | 14(2) | 2.4(19)  | -4.9(19) | -10(2) |
| C3 | 20(3) | 17(2) | 15(2) | 0.8(19)  | -1.8(19) | -6(2)  |
| C4 | 19(3) | 20(3) | 18(2) | 1(2)     | 4(2)     | -9(2)  |
| C5 | 24(3) | 17(2) | 14(2) | -1.3(19) | 0.3(19)  | -11(2) |
| C6 | 22(3) | 22(3) | 19(2) | -1(2)    | 2(2)     | -13(2) |
| O6 | 33(2) | 32(2) | 28(2) | -4.4(18) | -2.2(18) | -14(2) |

**Table S3.** Select bond lengths (Å) and angles (degree) for **I**, **II** and **III**.

**I**

---

|                                      |            |                         |            |
|--------------------------------------|------------|-------------------------|------------|
| La1-O1                               | 2.555(4)   | O9-C2                   | 1.254(6)   |
| La1-O2                               | 2.538(4)   | N1-C1                   | 1.362(7)   |
| La1-O3                               | 2.603(4)   | N1-C2                   | 1.349(6)   |
| La1-O4                               | 2.449(4)   | N2-C1                   | 1.358(6)   |
| La1-O5                               | 2.527(4)   | N2-C3                   | 1.353(7)   |
| La1-O5 <sup>1</sup>                  | 2.651(3)   | N3-C2                   | 1.378(6)   |
| La1-O7 <sup>2</sup>                  | 2.600(4)   | N3-C3                   | 1.367(7)   |
| La1-O8 <sup>2</sup>                  | 2.532(3)   | N4-C4                   | 1.354(7)   |
| La1-N1 <sup>1</sup>                  | 2.701(4)   | N4-C6                   | 1.388(6)   |
| O4-C4                                | 1.233(6)   | N5-C4                   | 1.352(6)   |
| O5-C1                                | 1.280(6)   | N5-C5                   | 1.405(6)   |
| O6-C6                                | 1.234(6)   | N6-C5                   | 1.347(7)   |
| O7-C5                                | 1.253(6)   | N6-C6                   | 1.349(7)   |
| O8-C3                                | 1.254(6)   |                         |            |
| O1-La1-O3                            | 138.95(13) | O82-La1-O7 <sup>2</sup> | 70.99(12)  |
| O1-La1-O5 <sup>1</sup>               | 69.85(12)  | O82-La1-N1 <sup>1</sup> | 140.72(13) |
| O1-La1-O7 <sup>2</sup>               | 76.03(14)  | C4-O4-La1               | 137.2(4)   |
| O1-La1-N1 <sup>1</sup>               | 72.12(12)  | La1-O5-La1 <sup>1</sup> | 112.18(12) |
| O2-La1-O1                            | 129.58(15) | C1-O5-La1               | 146.1(3)   |
| O2-La1-O3                            | 67.30(14)  | C1-O5-La1 <sup>1</sup>  | 100.7(3)   |
| O2-La1-O5 <sup>1</sup>               | 111.26(11) | C5-O7-La1 <sup>3</sup>  | 144.1(4)   |
| O2-La1-O7 <sup>2</sup>               | 68.66(13)  | C3-O8-La1 <sup>3</sup>  | 166.1(4)   |
| O2-La1-N1 <sup>1</sup>               | 73.66(12)  | C1-N1-La1 <sup>1</sup>  | 96.1(3)    |
| O3-La1-O5 <sup>1</sup>               | 69.10(12)  | C2-N1-La1 <sup>1</sup>  | 145.9(3)   |
| O3-La1-N1 <sup>1</sup>               | 80.84(13)  | C2-N1-C1                | 117.6(4)   |
| O4-La1-O1                            | 144.24(12) | C3-N2-C1                | 116.7(4)   |
| O4-La1-O2                            | 71.62(13)  | C3-N3-C2                | 122.5(4)   |
| O4-La1-O3                            | 72.13(13)  | C4-N4-C6                | 122.5(4)   |
| O4-La1-O5 <sup>1</sup>               | 135.38(13) | C4-N5-C5                | 121.5(4)   |
| O4-La1-O5                            | 78.24(12)  | C5-N6-C6                | 120.1(4)   |
| O4-La1-O7 <sup>2</sup>               | 90.33(13)  | O5-C1-N1                | 114.2(4)   |
| O4-La1-O8 <sup>2</sup>               | 74.53(13)  | O5-C1-N2                | 120.8(5)   |
| O4-La1-N1 <sup>1</sup>               | 142.08(13) | N2-C1-N1                | 125.0(5)   |
| O5-La1-O1                            | 96.10(14)  | O9-C2-N1                | 123.5(4)   |
| O5-La1-O2                            | 132.28(14) | O9-C2-N3                | 118.4(5)   |
| O5-La1-O3                            | 68.70(12)  | N1-C2-N3                | 118.1(5)   |
| O5-La1-O5 <sup>1</sup>               | 67.82(12)  | O8-C3-N2                | 121.6(5)   |
| O5-La1-O7 <sup>2</sup>               | 148.26(11) | O8-C3-N3                | 119.2(5)   |
| O5-La1-O8 <sup>2</sup>               | 77.41(12)  | N2-C3-N3                | 119.2(4)   |
| O5 <sup>1</sup> -La1-N1 <sup>1</sup> | 48.98(11)  | O4-C4-N4                | 121.2(5)   |
| O5-La1-N1 <sup>1</sup>               | 116.23(12) | O4-C4-N5                | 121.8(5)   |
| O7 <sup>2</sup> -La1-O3              | 135.75(13) | N5-C4-N4                | 117.1(4)   |

---

|                                      |            |          |          |
|--------------------------------------|------------|----------|----------|
| O7 <sup>2</sup> -La1-O5 <sup>1</sup> | 133.32(12) | O7-C5-N5 | 117.9(5) |
| O7 <sup>2</sup> -La1-N1 <sup>1</sup> | 90.96(12)  | O7-C5-N6 | 122.6(5) |
| O8 <sup>2</sup> -La1-O1              | 69.79(13)  | N6-C5-N5 | 119.5(5) |
| O8 <sup>2</sup> -La1-O2              | 126.16(12) | O6-C6-N4 | 117.0(5) |
| O8 <sup>2</sup> -La1-O3              | 136.21(13) | O6-C6-N6 | 123.8(5) |
| O8 <sup>2</sup> -La1-O5 <sup>1</sup> | 122.27(12) | N6-C6-N4 | 119.2(5) |

<sup>1</sup>1-X,1-Y,1-Z; <sup>2</sup>+X,1/2-Y,-1/2+Z; <sup>3</sup>+X,1/2-Y,1/2+Z

## II

|                                     |            |                        |            |
|-------------------------------------|------------|------------------------|------------|
| Y1-Y1 <sup>1</sup>                  | 3.7083(6)  | O12-C6                 | 1.242(4)   |
| Y1-O3                               | 2.366(2)   | N1-C1                  | 1.334(4)   |
| Y1-O5                               | 2.407(3)   | N1-C2                  | 1.339(4)   |
| Y1-O6                               | 2.273(2)   | N2-C1                  | 1.395(4)   |
| Y1-O6 <sup>1</sup>                  | 2.237(2)   | N2-C3                  | 1.357(4)   |
| Y1-O7                               | 2.370(3)   | N3-C2                  | 1.395(4)   |
| Y1-O8                               | 2.477(3)   | N3-C3                  | 1.358(4)   |
| Y1-O9                               | 2.409(3)   | N4-C4                  | 1.341(4)   |
| Y1-O10                              | 2.402(2)   | N4-C6                  | 1.344(4)   |
| O1-C1                               | 1.242(4)   | N5-C4                  | 1.383(4)   |
| O2-C2                               | 1.251(4)   | N5-C5                  | 1.360(4)   |
| O3-C3                               | 1.234(4)   | N6-C5                  | 1.358(4)   |
| O10-C4                              | 1.240(4)   | N6-C6                  | 1.386(4)   |
| O11-C5                              | 1.232(4)   |                        |            |
| O3-Y1-Y1 <sup>1</sup>               | 94.44(7)   | O10-Y1-Y1 <sup>1</sup> | 107.96(6)  |
| O3-Y1-O5                            | 76.82(10)  | O10-Y1-O5              | 122.51(10) |
| O3-Y1-O7                            | 148.91(10) | O10-Y1-O8              | 73.55(9)   |
| O3-Y1-O8                            | 68.54(9)   | O10-Y1-O9              | 73.42(9)   |
| O3-Y1-O9                            | 84.50(10)  | C3-O3-Y1               | 141.6(2)   |
| O3-Y1-O10                           | 139.91(9)  | Y1 <sup>1</sup> -O6-Y1 | 110.62(10) |
| O5-Y1-Y1 <sup>1</sup>               | 110.16(7)  | C4-O10-Y1              | 142.3(2)   |
| O5-Y1-O8                            | 131.54(9)  | C1-N1-C2               | 118.6(3)   |
| O5-Y1-O9                            | 68.73(10)  | C3-N2-C1               | 122.1(3)   |
| O6 <sup>1</sup> -Y1-Y1 <sup>1</sup> | 35.01(6)   | C3-N3-C2               | 122.5(3)   |
| O6-Y1-Y1 <sup>1</sup>               | 34.37(6)   | C4-N4-C6               | 118.8(3)   |
| O6-Y1-O3                            | 81.53(9)   | C5-N5-C4               | 122.8(3)   |
| O6 <sup>1</sup> -Y1-O3              | 106.15(10) | C5-N6-C6               | 122.8(3)   |
| O6-Y1-O5                            | 76.23(9)   | O1-C1-N1               | 121.7(3)   |
| O6 <sup>1</sup> -Y1-O5              | 144.42(9)  | O1-C1-N2               | 117.3(3)   |
| O6 <sup>1</sup> -Y1-O6              | 69.38(10)  | N1-C1-N2               | 120.9(3)   |
| O6-Y1-O7                            | 79.03(10)  | O2-C2-N1               | 123.1(3)   |
| O6 <sup>1</sup> -Y1-O7              | 89.38(11)  | O2-C2-N3               | 116.5(3)   |
| O6 <sup>1</sup> -Y1-O8              | 79.29(9)   | N1-C2-N3               | 120.3(3)   |
| O6-Y1-O8                            | 128.10(9)  | O3-C3-N2               | 122.8(3)   |

|                         |           |           |          |
|-------------------------|-----------|-----------|----------|
| O6-Y1-O9                | 144.39(9) | O3-C3-N3  | 121.8(3) |
| O6 <sup>1</sup> -Y1-O9  | 146.21(9) | N2-C3-N3  | 115.4(3) |
| O6 <sup>1</sup> -Y1-O10 | 78.54(9)  | O10-C4-N4 | 123.6(3) |
| O6-Y1-O10               | 134.31(9) | O10-C4-N5 | 116.1(3) |
| O7-Y1-Y1 <sup>1</sup>   | 82.93(8)  | N4-C4-N5  | 120.3(3) |
| O7-Y1-O5                | 75.13(11) | O11-C5-N5 | 122.0(3) |
| O7-Y1-O8                | 142.05(9) | O11-C5-N6 | 122.9(3) |
| O7-Y1-O9                | 97.51(12) | N6-C5-N5  | 115.1(3) |
| O7-Y1-O10               | 68.71(9)  | O12-C6-N4 | 122.4(3) |
| O8-Y1-Y1 <sup>1</sup>   | 105.44(7) | O12-C6-N6 | 117.4(3) |
| O9-Y1-Y1 <sup>1</sup>   | 178.61(7) | N4-C6-N6  | 120.2(3) |
| O9-Y1-O8                | 75.03(10) |           |          |

<sup>1</sup>1-X,-Y,-Z

### III

|                                       |            |                          |            |
|---------------------------------------|------------|--------------------------|------------|
| Gd1-Gd1 <sup>1</sup>                  | 3.7713(5)  | O12-C5                   | 1.241(6)   |
| Gd1-O3                                | 2.411(4)   | N1-C1                    | 1.340(7)   |
| Gd1-O4                                | 2.309(3)   | N1-C2                    | 1.348(7)   |
| Gd1-O4 <sup>1</sup>                   | 2.282(4)   | N2-C1                    | 1.402(7)   |
| Gd1-O5                                | 2.462(4)   | N2-C3                    | 1.371(7)   |
| Gd1-O7                                | 2.421(4)   | N3-C2                    | 1.395(6)   |
| Gd1-O8                                | 2.521(4)   | N3-C3                    | 1.361(7)   |
| Gd1-O9                                | 2.463(4)   | N4-C4                    | 1.387(7)   |
| Gd1-O10                               | 2.435(4)   | N4-C6                    | 1.359(7)   |
| O1-C1                                 | 1.238(7)   | N5-C4                    | 1.346(7)   |
| O2-C2                                 | 1.244(6)   | N5-C5                    | 1.342(7)   |
| O3-C3                                 | 1.227(6)   | N6-C5                    | 1.395(6)   |
| O10-C4                                | 1.251(6)   | N6-C6                    | 1.355(7)   |
| O11-C6                                | 1.226(6)   |                          |            |
| O3-Gd1-Gd1 <sup>1</sup>               | 94.16(10)  | O10-Gd1-Gd1 <sup>1</sup> | 107.24(9)  |
| O3-Gd1-O5                             | 76.50(14)  | O10-Gd1-O5               | 123.06(14) |
| O3-Gd1-O7                             | 148.39(14) | O10-Gd1-O8               | 73.86(13)  |
| O3-Gd1-O8                             | 68.98(12)  | O10-Gd1-O9               | 73.25(14)  |
| O3-Gd1-O9                             | 85.89(15)  | C3-O3-Gd1                | 141.7(4)   |
| O3-Gd1-O10                            | 140.89(13) | Gd1 <sup>1</sup> -O4-Gd1 | 110.46(14) |
| O4 <sup>1</sup> -Gd1-Gd1 <sup>1</sup> | 35.00(9)   | C4-O10-Gd1               | 141.7(4)   |
| O4-Gd1-Gd1 <sup>1</sup>               | 34.53(9)   | C1-N1-C2                 | 119.2(4)   |
| O4-Gd1-O3                             | 80.98(13)  | C3-N2-C1                 | 121.8(4)   |
| O4 <sup>1</sup> -Gd1-O3               | 106.18(14) | C3-N3-C2                 | 122.9(5)   |
| O4 <sup>1</sup> -Gd1-O4               | 69.54(14)  | C6-N4-C4                 | 122.8(5)   |
| O4-Gd1-O5                             | 75.79(13)  | C5-N5-C4                 | 118.8(4)   |
| O4 <sup>1</sup> -Gd1-O5               | 144.12(14) | C6-N6-C5                 | 122.8(4)   |
| O4-Gd1-O7                             | 78.79(14)  | O1-C1-N1                 | 122.4(5)   |
| O4 <sup>1</sup> -Gd1-O7               | 89.13(15)  | O1-C1-N2                 | 117.1(5)   |



---

|                          |            |           |          |
|--------------------------|------------|-----------|----------|
| O4 <sup>1</sup> -Gd1-O8  | 79.33(13)  | N1-C1-N2  | 120.6(5) |
| O4-Gd1-O8                | 128.14(13) | O2-C2-N1  | 123.1(5) |
| O4-Gd1-O9                | 144.57(13) | O2-C2-N3  | 117.0(5) |
| O4 <sup>1</sup> -Gd1-O9  | 145.88(13) | N1-C2-N3  | 119.9(5) |
| O4 <sup>1</sup> -Gd1-O10 | 77.89(13)  | O3-C3-N2  | 122.6(5) |
| O4-Gd1-O10               | 133.74(13) | O3-C3-N3  | 121.9(5) |
| O5-Gd1-Gd1 <sup>1</sup>  | 109.87(10) | N3-C3-N2  | 115.5(4) |
| O5-Gd1-O8                | 131.70(14) | O10-C4-N4 | 116.2(5) |
| O5-Gd1-O9                | 69.18(14)  | O10-C4-N5 | 123.5(5) |
| O7-Gd1-Gd1 <sup>1</sup>  | 82.64(11)  | N5-C4-N4  | 120.3(5) |
| O7-Gd1-O5                | 75.16(15)  | O12-C5-N5 | 122.4(5) |
| O7-Gd1-O8                | 142.22(13) | O12-C5-N6 | 117.6(5) |
| O7-Gd1-O9                | 96.80(16)  | N5-C5-N6  | 120.0(5) |
| O7-Gd1-O10               | 68.55(14)  | O11-C6-N4 | 122.5(5) |
| O8-Gd1-Gd1 <sup>1</sup>  | 105.43(9)  | O11-C6-N6 | 122.3(5) |
| O9-Gd1-Gd1 <sup>1</sup>  | 179.01(10) | N6-C6-N4  | 115.2(5) |
| O9-Gd1-O8                | 75.51(14)  |           |          |

---

<sup>1</sup>1-X,-Y,-Z

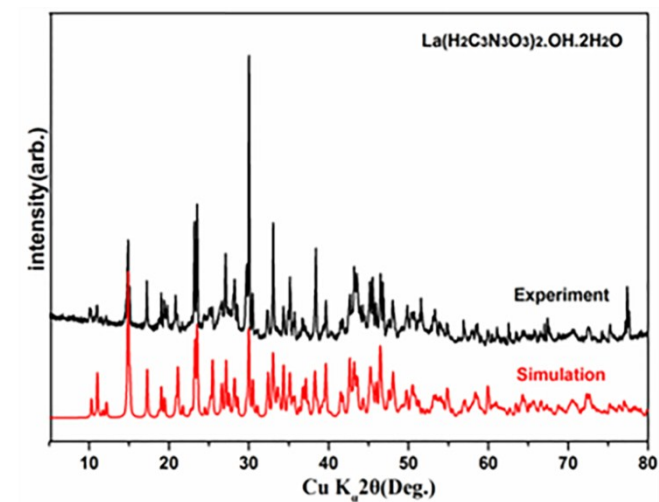

(a)

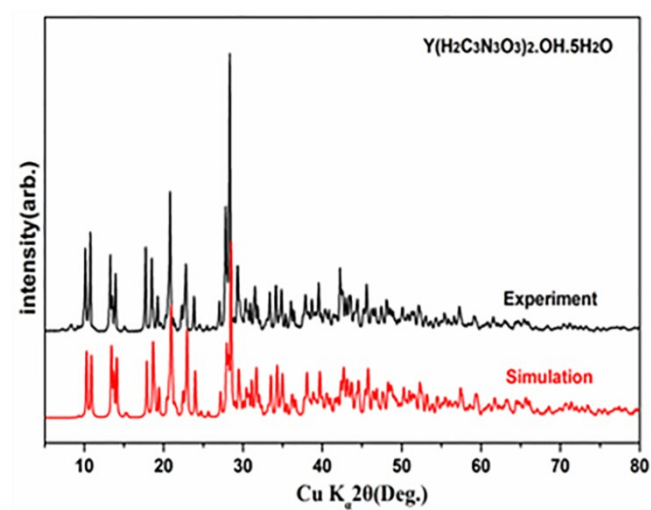

(b)

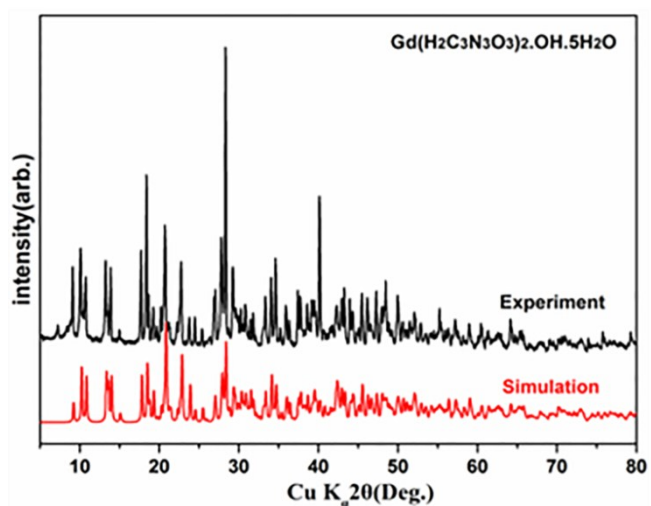

(c)

**Figure S1.** Calculated and experimental powder X-ray diffraction patterns of **I** (a), **II** (b) and **III** (c). The black curves are the patterns of samples, the red are the calculated ones.

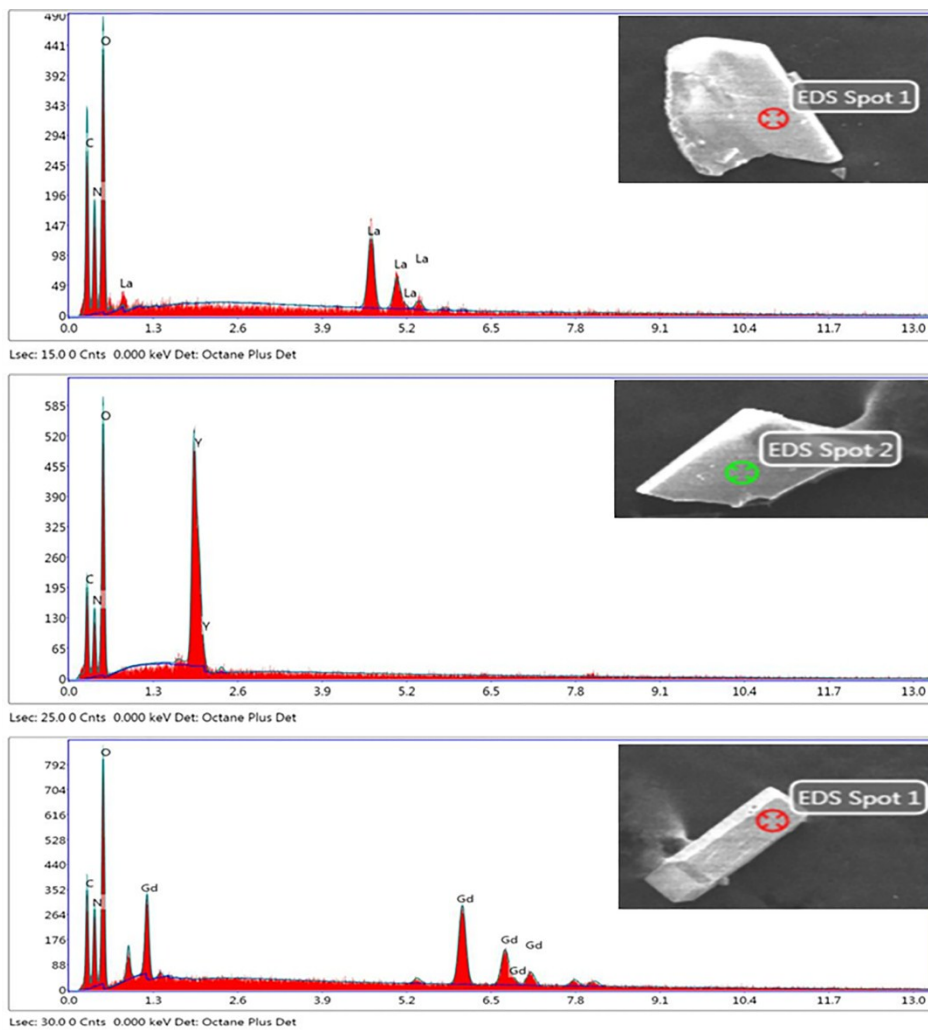

**Figure S2.** Energy dispersive X-ray spectroscopy analysis of **I**, **II** and **III**.

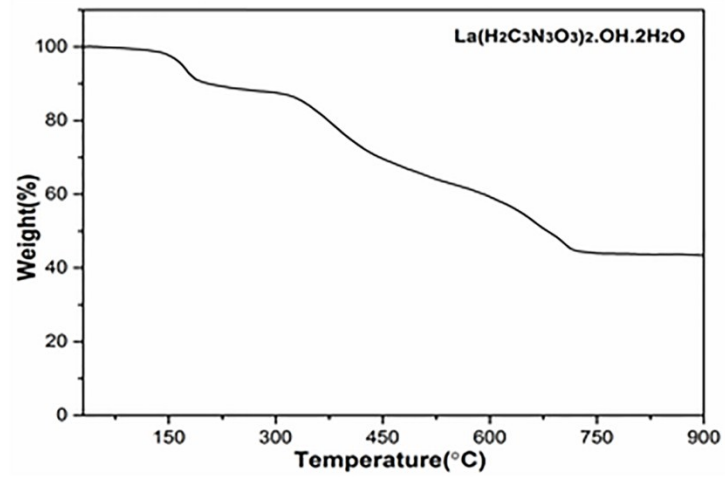

(a)

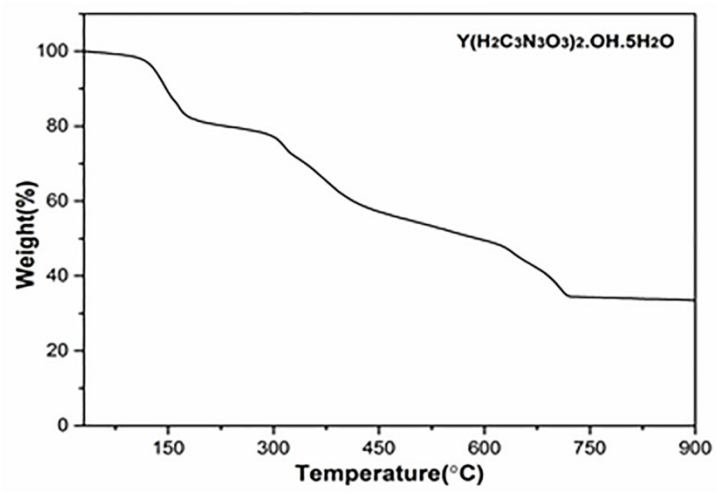

(b)

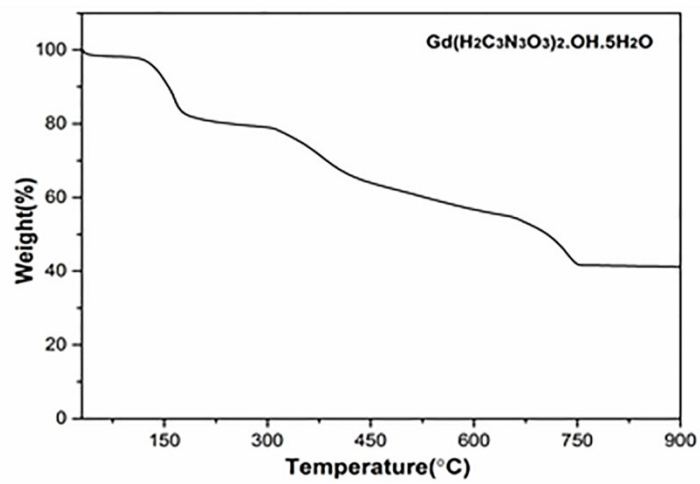

(c)

Figure S3. The TG diagrams for I (a), II (b) and III (c).

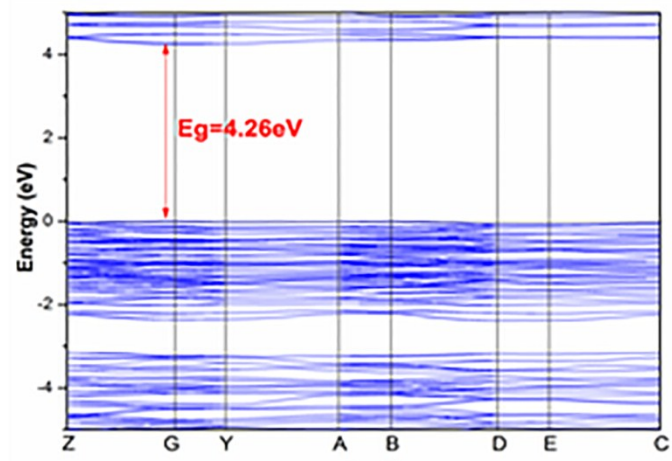

(a)

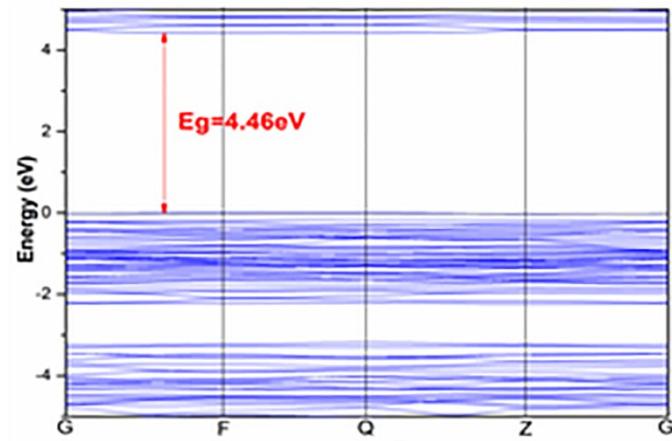

(b)

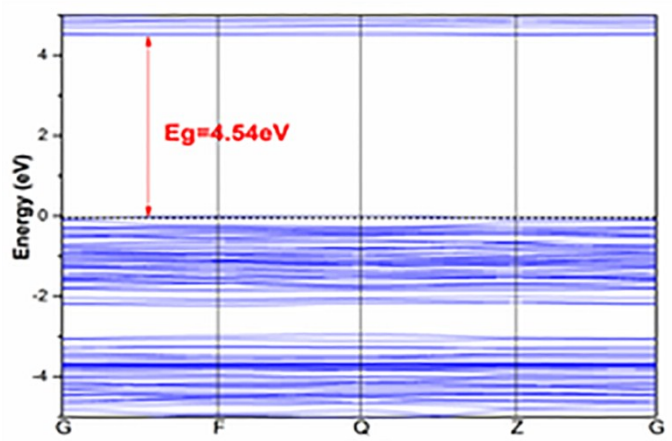

(c)

Figure S4. The band structure of I (a), II (b) and III (c).

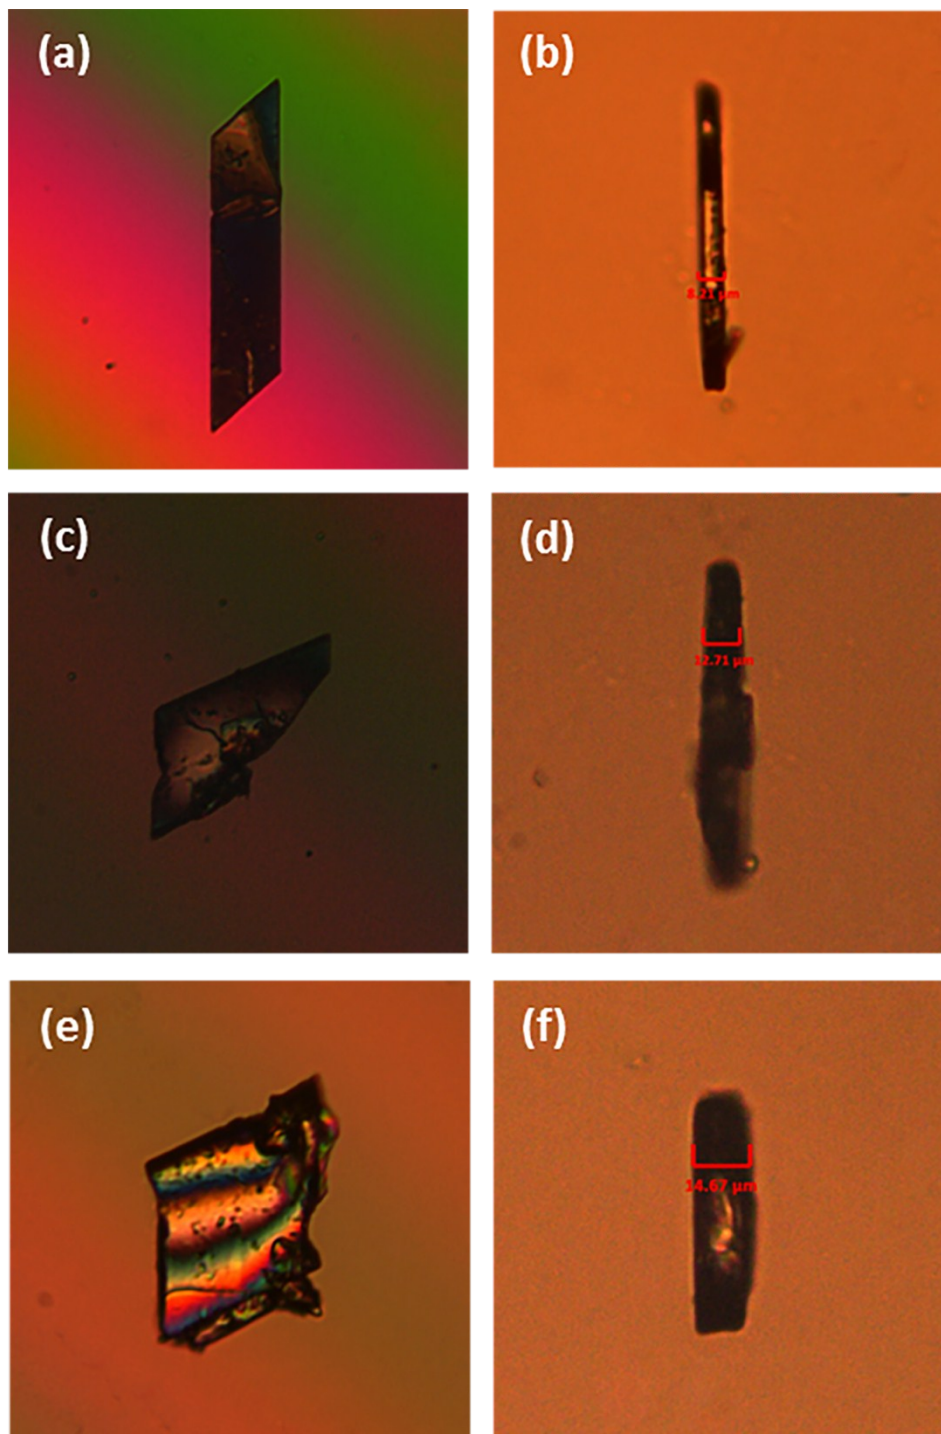

Figure S5. Photograph of crystals I (a, b), II (c, d) and III (e, f) for the measurement of birefringence.

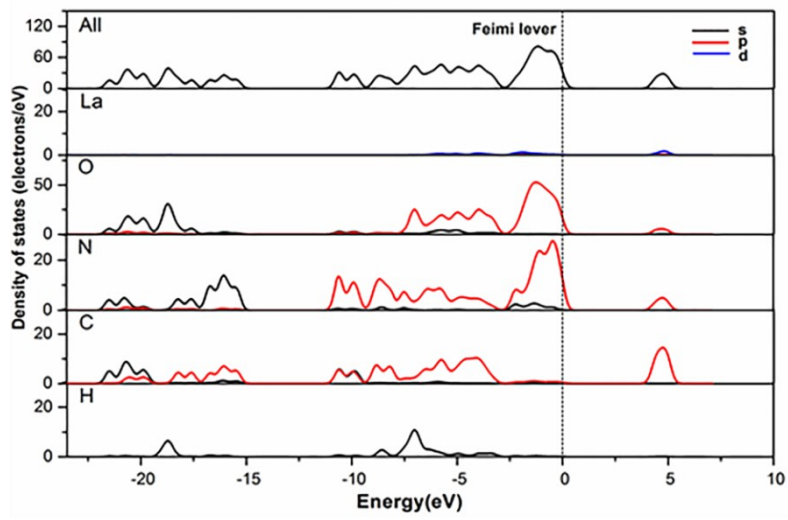

(a)

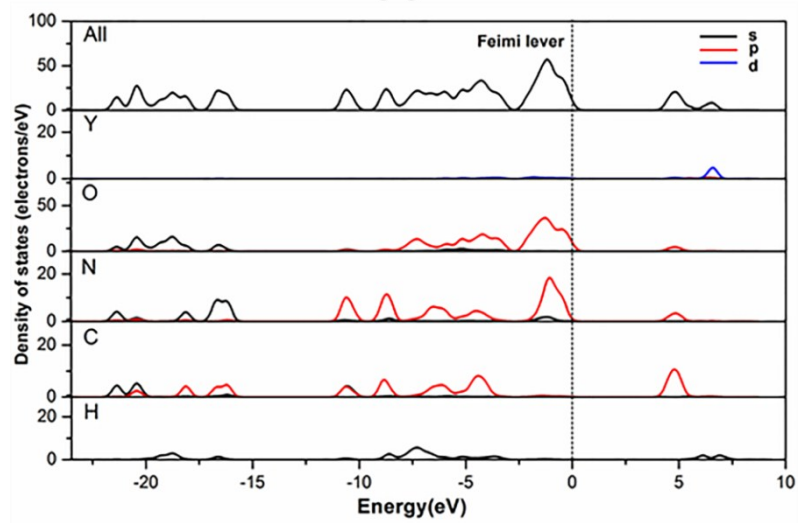

(b)

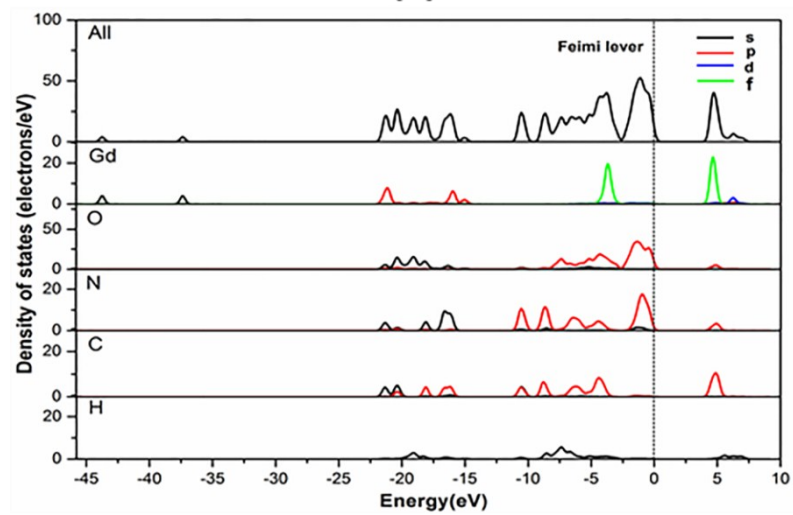

(c)

Figure S6. Densities of states for I (a), II (b) and III (c).

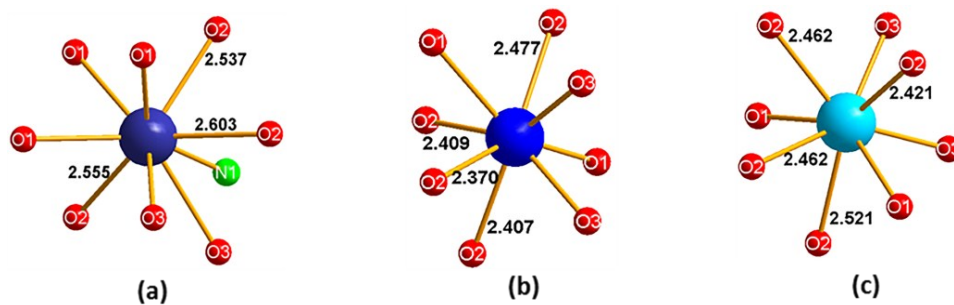

**Figure S7.** The bond length of La-O2 (a), Y-O2 (b) and Gd-O2 (c), O2 participates in the formation of water molecules.

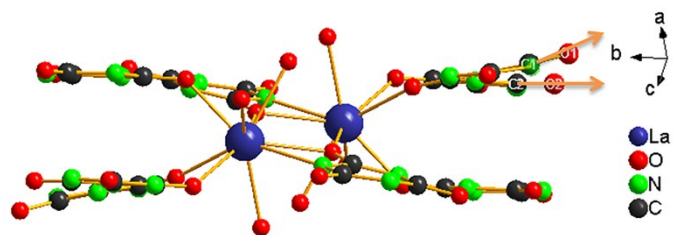

**Figure S8.** The 3D framework of **I** with the calculational inclination angle ( $\theta$ ) of anion groups ( $\text{H}_2\text{C}_3\text{N}_3\text{O}_3$ );  $\theta = 15.87^\circ$ .
